# Supplementary material
Source: publisher figshare collection journal article supplement (https://sage.figshare.com/ndownloader/files/15592631)
Supplement: Supplementary file 1 [file 15592631]

**Appendix Table 1**  
**Description of the Dependent, Independent and Control Variables**

| <b>Variables</b>                                                    | <b>Description</b>                                                                                                                                                                                                                                                                                                                                        |
|---------------------------------------------------------------------|-----------------------------------------------------------------------------------------------------------------------------------------------------------------------------------------------------------------------------------------------------------------------------------------------------------------------------------------------------------|
| <b>Dependent Variable</b>                                           |                                                                                                                                                                                                                                                                                                                                                           |
| Log of annual household earnings                                    | Log of the sum of the earnings of all the household members aged $\geq 16$ from wages, own business or farm for the previous year                                                                                                                                                                                                                         |
| <b>Independent and Control Variables</b>                            |                                                                                                                                                                                                                                                                                                                                                           |
| Household type                                                      | Nuclear - a householder, spouse, and/or single dependent unmarried children age $\leq 24$ but no other individuals;<br>Nonnuclear - residual category (Reference category - Nuclear)                                                                                                                                                                      |
| Householder's ethnicity                                             | Chinese; Filipino; Indian; Japanese; Korean; Vietnamese; Non-Hispanic White; Reference category - Non-Hispanic White<br>(Foreign born Asian- born in China, India, Japan, Korea, the Philippines, or in Vietnam; Native born - born in the U.S)                                                                                                           |
| <b>Householder's human capital</b>                                  |                                                                                                                                                                                                                                                                                                                                                           |
| Education                                                           | High school or less; Some college; College/higher degree; Reference category - College/higher degree                                                                                                                                                                                                                                                      |
| Age                                                                 | Completed age in years                                                                                                                                                                                                                                                                                                                                    |
| Square of age                                                       | Square of completed age in years                                                                                                                                                                                                                                                                                                                          |
| Annual hours worked                                                 | Annual hours worked by the householder                                                                                                                                                                                                                                                                                                                    |
| Annual hours worked squared                                         | Square of annual hours worked by the householder                                                                                                                                                                                                                                                                                                          |
| Occupation                                                          | Unemployed; Management, business & financial operations & professionals; Service including military;<br>Sales; Office & administrative support; Farming, fishing & forestry; Construction, extraction & maintenance ;<br>Production, transportation and material moving; Reference category - Management, business & financial operations & professionals |
| <b>Members other than the householder's labor market attachment</b> |                                                                                                                                                                                                                                                                                                                                                           |
| Annual hours worked                                                 | Annual hours worked by members other than the householder who are age $\geq 16$                                                                                                                                                                                                                                                                           |
| Square of annual hours worked                                       | Square of annual hours worked by members other than the householder who are age $\geq 16$                                                                                                                                                                                                                                                                 |
| <b>Householder's immigration specific characteristics</b>           |                                                                                                                                                                                                                                                                                                                                                           |
| Duration of stay                                                    | $< 0$ to $\leq 10$ years (Short-term stay); $< 10$ to $\leq 20$ years (Medium-term stay); $> 20$ years (Long-term stay); Reference category - $> 20$ years                                                                                                                                                                                                |
| English language proficiency                                        | Speaks no English/does not speak well; Speaks English well; Speaks English very well /only English;<br>Reference category - Speaks English very well/only English                                                                                                                                                                                         |
| Received education in the U.S.                                      | Less than college; College/higher degree not in the U.S. ; College/higher degree in the U.S. ; Reference category - College/higher degree in the U.S.                                                                                                                                                                                                     |
| <b>Demographic characteristics</b>                                  |                                                                                                                                                                                                                                                                                                                                                           |
| Sex of the householder                                              | Female ; Male ; Reference category - Male                                                                                                                                                                                                                                                                                                                 |
| Marital status of the householder                                   | Married ; Single ; Reference category - Married                                                                                                                                                                                                                                                                                                           |
| Region of residence                                                 | Northeast; Midwest; South; Rest of the west; Pacific (comprises Alaska, California, Hawaii; Oregon, Washington); Reference category - Pacific                                                                                                                                                                                                             |
| Metro residence                                                     | Metro residence; Non-metro residence ; Reference category - Non-metro residence                                                                                                                                                                                                                                                                           |

Data Source : ACS Data 2009-2011.

**Appendix Table 2. Summary Statistics of Dependent and Select Independent and Control Variables for Asians and for Whites**  
**(Universe includes Households Reporting Positive Household Earnings in 2009-2011)**

|                                                                                              | <b>Chinese</b>         | <b>Filipino</b>        | <b>Indian</b>           | <b>Japanese</b>        | <b>Korean</b>          | <b>Vietnamese</b>      | <b>White</b>           |
|----------------------------------------------------------------------------------------------|------------------------|------------------------|-------------------------|------------------------|------------------------|------------------------|------------------------|
| <b>Dependent Variable</b>                                                                    |                        |                        |                         |                        |                        |                        |                        |
| Logarithm of annual household earnings                                                       | 78427.21<br>(64961.21) | 83015.67<br>(55383.10) | 107240.21<br>(68266.86) | 74837.17<br>(62975.51) | 72141.27<br>(59538.52) | 69970.46<br>(56861.10) | 70253.95<br>(57371.03) |
| <b>Independent Variables (in percentage)</b>                                                 |                        |                        |                         |                        |                        |                        |                        |
| <b>Household Type</b>                                                                        |                        |                        |                         |                        |                        |                        |                        |
| Nuclear (Reference category)                                                                 | 65.30                  | 57.86                  | 75.77                   | 85.69                  | 72.10                  | 57.24                  | 77.77                  |
| Vertically extended                                                                          | 18.15                  | 21.30                  | 13.30                   | 6.64                   | 14.94                  | 20.40                  | 8.67                   |
| Horizontally extended                                                                        | 5.86                   | 10.82                  | 4.12                    | 1.27                   | 5.33                   | 12.73                  | 2.48                   |
| Other                                                                                        | 10.69                  | 10.02                  | 6.81                    | 6.39                   | 7.63                   | 9.63                   | 11.09                  |
| <b>Householder's human capital</b>                                                           |                        |                        |                         |                        |                        |                        |                        |
| <b>Education</b>                                                                             |                        |                        |                         |                        |                        |                        |                        |
| High school or less                                                                          | 31.69                  | 14.62                  | 7.92                    | 16.25                  | 21.02                  | 40.95                  | 29.89                  |
| Some college                                                                                 | 11.19                  | 28.38                  | 8.21                    | 21.64                  | 21.28                  | 26.91                  | 33.9                   |
| College/higher degree (Reference category)                                                   | 57.11                  | 57                     | 83.86                   | 62.11                  | 57.7                   | 32.14                  | 36.21                  |
| <b>Age</b>                                                                                   | 45.83<br>(13.71)       | 49.44<br>(12.84)       | 42.03<br>(12.80)        | 47.47<br>(13.25)       | 46.11<br>(12.77)       | 46.87<br>(12.09)       | 47.15<br>(14.21)       |
| <b>Annual hours worked</b>                                                                   | 1666.39 (938.81)       | 1629.36 (634.82)       | 1858.69 (866.91)        | 1815.23 (920.31)       | 1742.10 (1002.86)      | 1614.70 (673.97)       | 1705.51 (938.01)       |
| <b>Members <math>\geq</math> age 16 other than the householder's labor market attachment</b> |                        |                        |                         |                        |                        |                        |                        |
| <b>Annual hours worked</b>                                                                   | 1674.90 (1731.33)      | 1910.12 (1848.32)      | 1548.73 (1411.21)       | 742.65 (1163.19)       | 1456.19 (1524.23)      | 1900.23 (1691.70)      | 1016.72 (1133.14)      |
| <b>Householder's immigration specific characteristics</b>                                    |                        |                        |                         |                        |                        |                        |                        |
| <b>Duration of stay</b>                                                                      |                        |                        |                         |                        |                        |                        |                        |
| $< 0$ to $\leq 10$ years (Short-term stay)                                                   | 32.04                  | 18.10                  | 42.11                   | 33.21                  | 18.98                  | 10.63                  |                        |
| $< 10$ to $\leq 20$ years (Medium-term stay)                                                 | 33.73                  | 24.82                  | 27.33                   | 19.99                  | 22.25                  | 32.69                  |                        |
| $> 20$ years (Long term) (Reference category)                                                | 34.23                  | 57.08                  | 30.56                   | 46.79                  | 58.77                  | 56.68                  |                        |
| <b>English language ability</b>                                                              |                        |                        |                         |                        |                        |                        |                        |
| Speaks no English/ does not speak well                                                       | 30.91                  | 3.13                   | 3.40                    | 15.08                  | 24.39                  | 29.19                  | 0.27                   |
| Speaks English well                                                                          | 30.38                  | 21.30                  | 16.21                   | 31.86                  | 29.69                  | 33.26                  | 0.60                   |
| Speaks English very well/only English (Reference category)                                   | 38.71                  | 75.57                  | 80.39                   | 53.07                  | 45.91                  | 37.55                  | 99.13                  |
| <b>Received education in the U.S.</b>                                                        |                        |                        |                         |                        |                        |                        |                        |
| Less than college                                                                            | 42.89                  | 43.00                  | 16.14                   | 37.89                  | 42.30                  | 67.86                  |                        |
| Non-U.S. college/higher degree                                                               | 30.61                  | 40.99                  | 50.34                   | 39.26                  | 29.60                  | 8.85                   |                        |
| Received college education in the U.S. (Reference category)                                  | 26.50                  | 16.01                  | 33.53                   | 22.85                  | 28.10                  | 23.30                  |                        |
| <b>Householder's demographic characteristics</b>                                             |                        |                        |                         |                        |                        |                        |                        |
| <b>Sex</b>                                                                                   |                        |                        |                         |                        |                        |                        |                        |
| Female                                                                                       | 37.43                  | 49.48                  | 23.85                   | 44.87                  | 46.33                  | 33.68                  | 43.70                  |
| Male (Reference category)                                                                    | 62.57                  | 50.52                  | 76.15                   | 55.13                  | 53.67                  | 66.32                  | 56.30                  |
| <b>Marital status</b>                                                                        |                        |                        |                         |                        |                        |                        |                        |
| Married (Reference category)                                                                 | 64.61                  | 63.61                  | 74.84                   | 42.51                  | 59.61                  | 65.52                  | 56.00                  |
| Single                                                                                       | 35.39                  | 36.39                  | 25.16                   | 57.49                  | 40.39                  | 34.48                  | 44.00                  |
| <b>Region of residence</b>                                                                   |                        |                        |                         |                        |                        |                        |                        |
| Northeast                                                                                    | 33.45                  | 12.56                  | 28.51                   | 18.69                  | 22.58                  | 10.07                  | 18.31                  |
| Midwest                                                                                      | 11.31                  | 8.99                   | 18.41                   | 12.39                  | 11.05                  | 8.70                   | 26.16                  |
| South                                                                                        | 18.00                  | 15.81                  | 28.58                   | 18.27                  | 22.41                  | 33.73                  | 35.05                  |
| Rest of the west                                                                             | 3.13                   | 6.00                   | 2.73                    | 5.14                   | 4.29                   | 4.59                   | 7.93                   |
| Pacific (Reference category)                                                                 | 34.11                  | 56.65                  | 21.77                   | 45.51                  | 39.66                  | 42.91                  | 12.55                  |
| <b>Metro residence</b>                                                                       |                        |                        |                         |                        |                        |                        |                        |
| Metro                                                                                        | 96.10                  | 95.07                  | 96.55                   | 92.64                  | 96.23                  | 96.38                  | 73.23                  |
| Nonmetro (Reference category)                                                                | 3.90                   | 4.93                   | 3.45                    | 7.36                   | 3.77                   | 3.62                   | 26.77                  |
| <b>Unweighted number of observations</b>                                                     | 11,642                 | 14,426                 | 13,664                  | 2,379                  | 7,463                  | 8,120                  | 649,707                |

Note: The statistics in the brackets denote standard deviation.

Data Source : ACS Data 2009-2011.
